# Supplementary material for: Lösliche Guanylatzyklase(sGC)-Stimulation mit Vericiguat
Source: Springer Nature journal article supplement (doi:10.1007/s12181-022-00576-y), 2022-10-12
Supplement: MOESM1 [file 23595500]

# Zusatzmaterial

## Electronic Supplementary Material (ESM)

### SOCRATES-REDUCED: Studiendesign

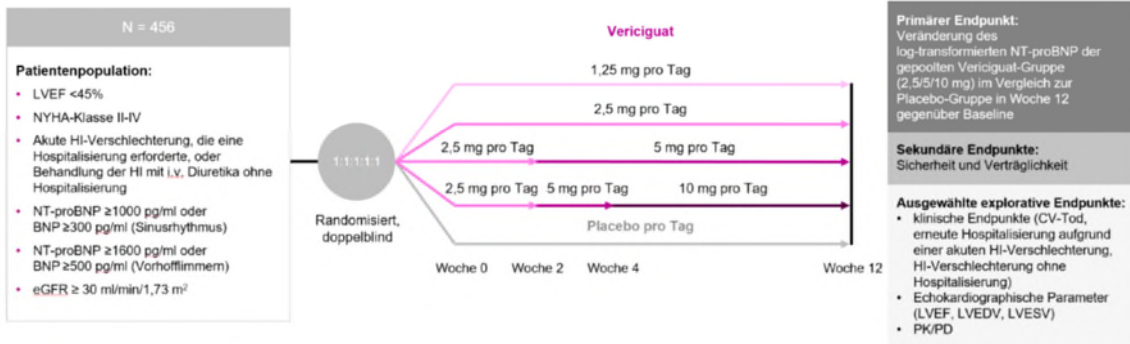

Zusätzliche Abbildung 1: Studiendesign SOCRATES-Reduced; nach [Gheorghiad 2015]

### Analysen des primären Endpunkts in SOCRATES-REDUCED

**Primärer Endpunkt:** Veränderung des NT-proBNP in Woche 12 gegenüber Baseline

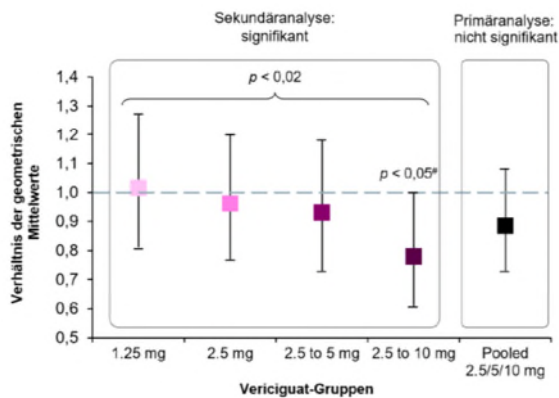

- Nach 12 Wochen wurde kein statistisch signifikanter Unterschied in der Veränderung des NT-proBNP-Werts in den gepoolten 2,5 / 5 / 10 mg Vericiguat-Armen im Vergleich zu Placebo festgestellt ( $p = 0,15$ ).
- In der sekundären explorativen Analyse zur Beurteilung der optimalen Dosis für Phase-III-Studien:
  - waren höhere Vericiguat-Dosen mit einer stärkeren Verringerung des NT-proBNP-Spiegels verbunden ( $p < 0,02$ ), was auf eine Dosis-Wirkungs-Beziehung hindeutet
  - zeigte sich im 10 mg-Arm in Woche 12 eine stärkere Reduktion des NT-proBNP gegenüber Placebo ( $p = 0,048$ ).

Zusätzliche Abbildung 2: Primärer Endpunkt in SOCRATES-Reduced; nach [Gheorghiad 2015]

## SOCRATES-REDUCED: Blutdruck, Herzfrequenz, Nierenfunktion und Troponin

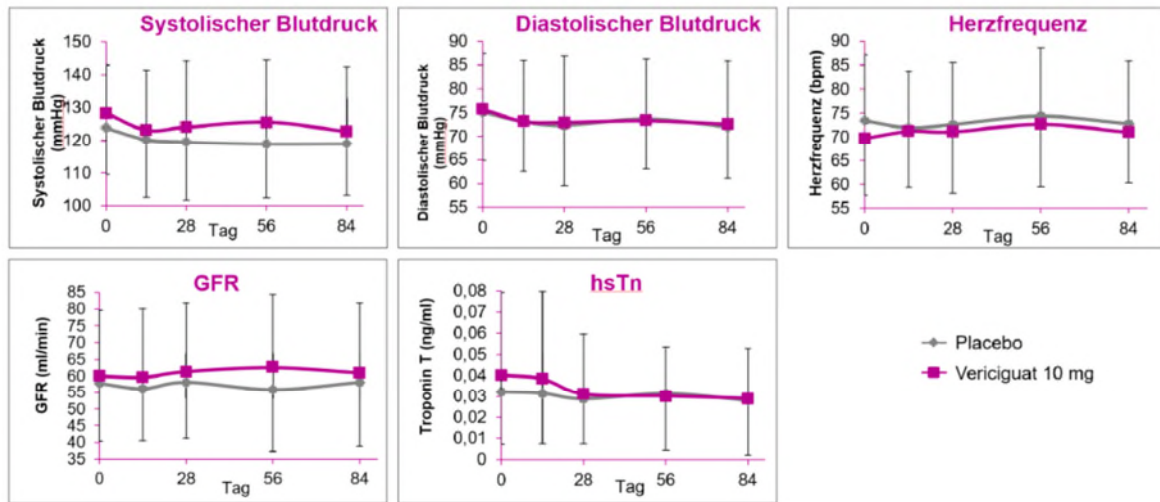

Änderungen hinsichtlich der exploratorischen Endpunkte Blutdruck, Herzfrequenz, Nierenfunktion und Troponin ab Baseline bis Woche 12 waren vergleichbar zwischen der Placebo-Gruppe und der 10 mg-Vericiguat-Gruppe.

Zusätzliche Abbildung 3: Sicherheitsrelevante Parameter im Vergleich zu Placebo (SOCRATES-REDUCED); nach [Gheorghiade 2015]

## VICTORIA Phase III: Studiendesign

Untersuchung der Wirksamkeit und Sicherheit von Vericiguat vs. Placebo vor dem Hintergrund der üblichen HF- Standardbehandlung bei Patienten mit sich verschlechternder chronischer Herzinsuffizienz (EF < 45%)

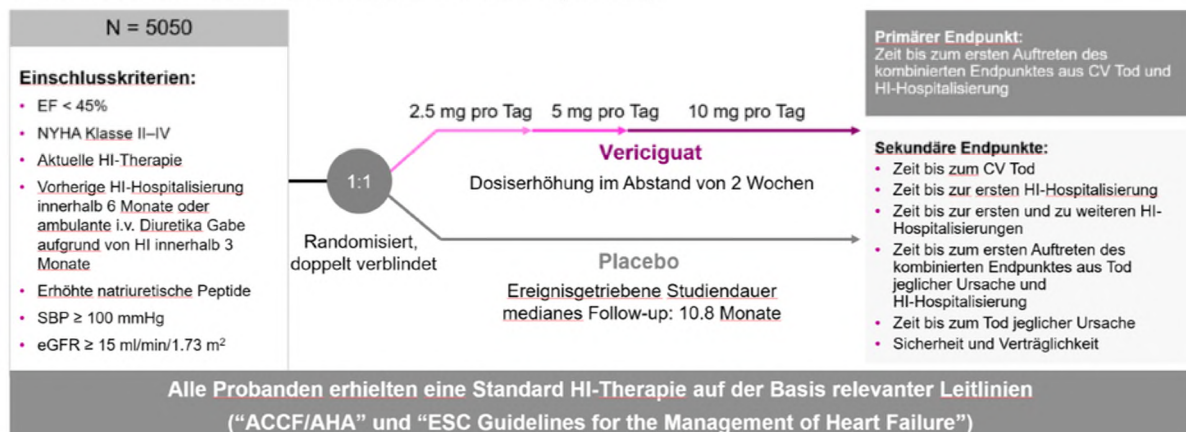

Zusätzliche Abbildung 4: VICTORIA Studiendesign; nach [Armstrong 2018]

## Über das gesamte Spektrum der NT-proBNP-Spiegel hinweg ist ein Behandlungseffekt mit Vericiguat bis zu 8000 pg/ml klar ersichtlich

Primärer kombinierter Endpunkt

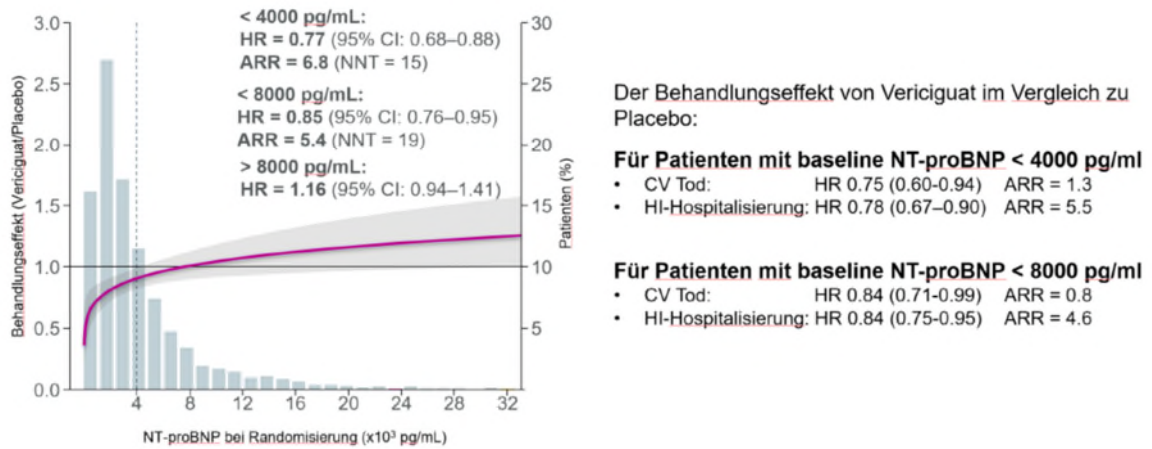

**Zusätzliche Abbildung 5:** Behandlungseffekt in Abhängigkeit von NT-proBNP Spiegel zu Baseline (VICTORIA-Studie); nach [Ezekowitz 2020]
